# Supplementary material for: Thick GaN growth via GaN nanodot formation by HVPE
Source: Royal Society of Chemistry journal article supplement (doi:10.1039/c6ce02125e), 2016-11-29
Supplement: c6ce02125e1.pdf [file c6ce02125e1.pdf]

Electronic supplementary information

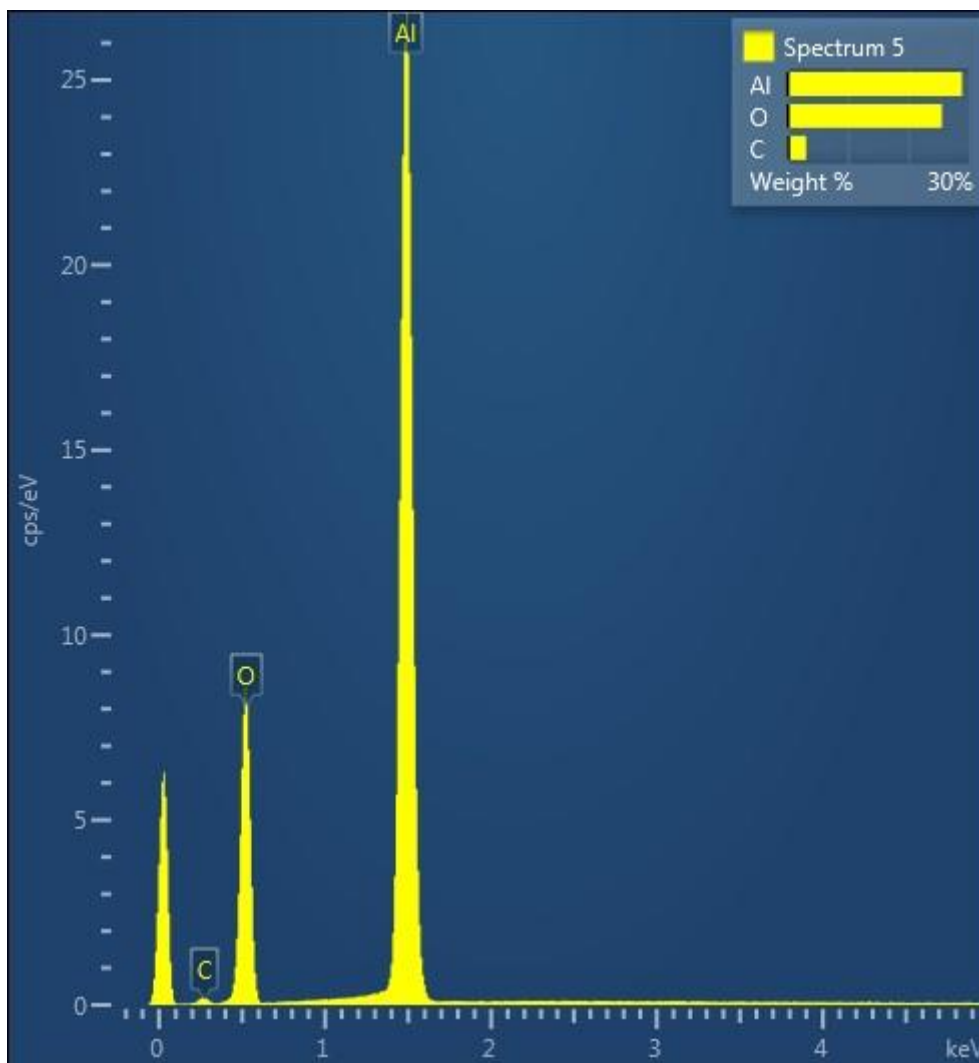

| Element | Line Type | Apparent Concentration | Wt%   | Atomic % |
|---------|-----------|------------------------|-------|----------|
| C       | K series  | 0.36                   | 3.11  | 8.86     |
| O       | K series  | 26.53                  | 25.52 | 54.57    |
| Al      | K series  | 28.86                  | 28.83 | 36.56    |
| Total:  |           |                        | 57.47 | 100.00   |

Fig. S1 EDX analysis of bare sapphire substrate without any surface treatment

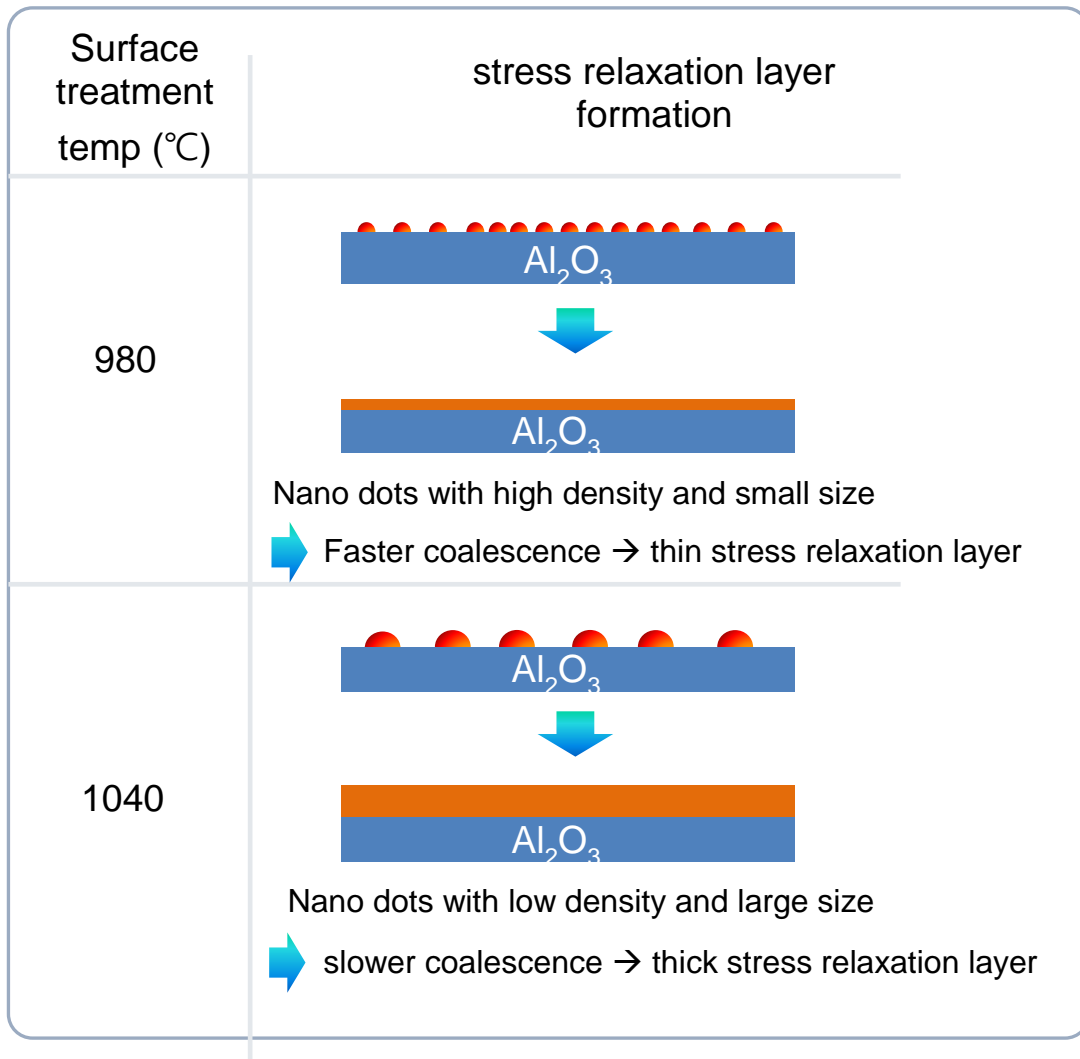

Fig. S2 A schematic diagram of stress relaxation layer formation as a function of surface treatment temperatures.

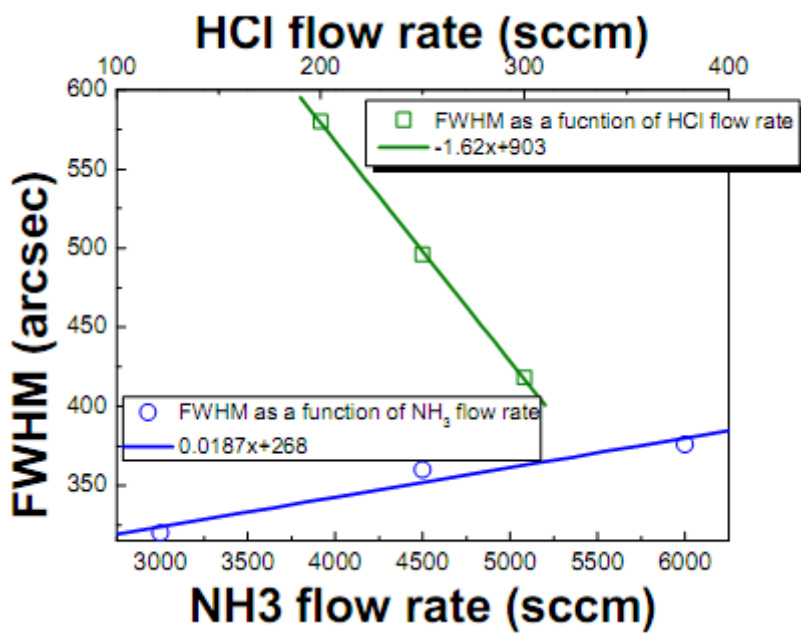

Fig. S3. The FWHM of X-ray rocking curves for thick GaN on Al<sub>2</sub>O<sub>3</sub> substrate as a function of HCl and NH<sub>3</sub> flow rate during surface treatment at 980 °C.
